# Supplementary material
Source: publisher figshare collection journal article supplement (https://karger.figshare.com/articles/dataset/_/5104705)
Supplement: Supplementary file 1 [file 1]

**Supp figure 6:** Relative mean expression values in the trisomy samples and the euploid control samples in each of the 22 plus X/Y chromosomes. The bold diamond represents the mean relative expression value for each chromosome and the solid vertical lines of the diamonds are the mean deviation. **A)** Trisomy 13 AC samples compared to AC euploid samples, **B)** Trisomy 18 CV samples compared to CV euploid samples, **C)** Trisomy 21 AC samples compared to AC euploid samples, **D)** Trisomy 21 CV samples compared to CV euploid samples.

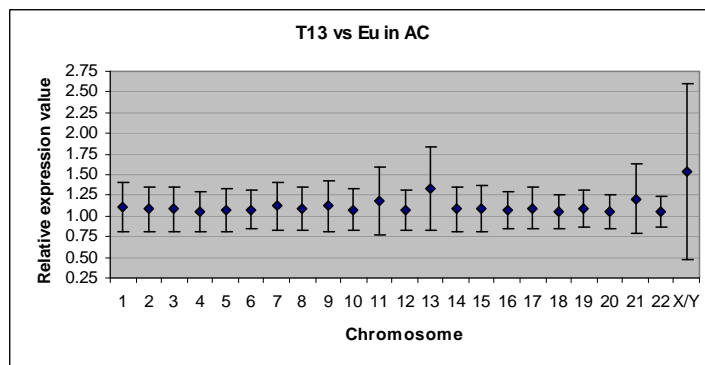

**A**

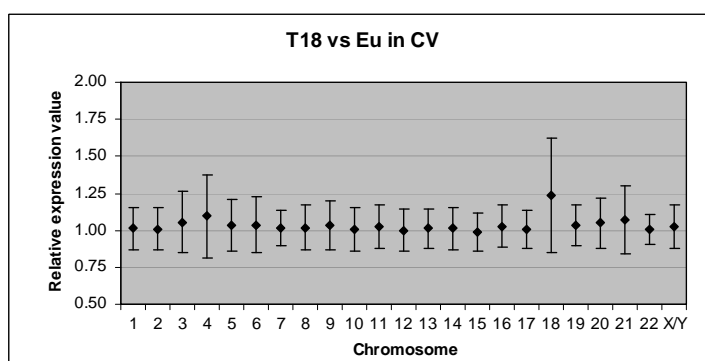

**B**

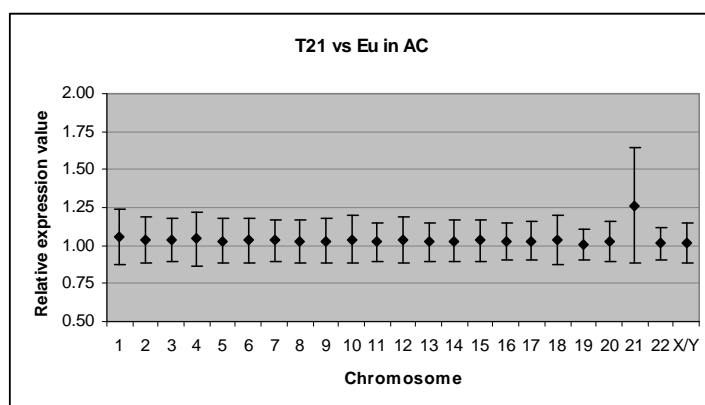

**C**

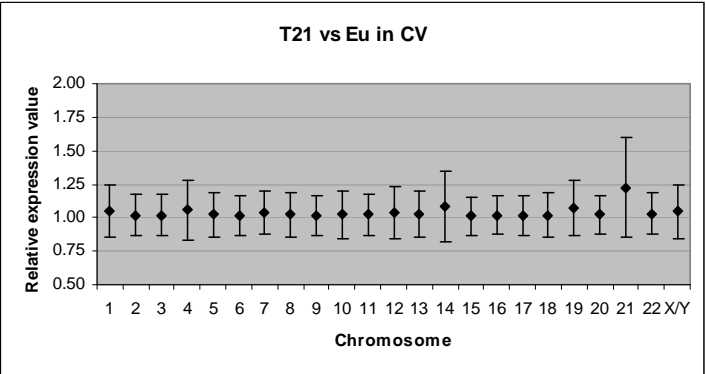

D
